# Supplementary material
Source: HighWire-hosted journal article supplement (https://thorax.bmj.com/highwire/filestream/174163/field_highwire_adjunct_files/0/Thorax01573.pdf)
Supplement: Thorax01573.pdf [file Thorax01573.pdf]

The following tables provide further details of the variables that were analysed and found not to add significantly to the already identified predictors of outcome.

It is suggested that if accepted these be included on the web site but not within the full published text for the sake of brevity. They are not referred to in the current text document for this reason.

Table 1a: Death due to COPD within 3 months of admission: summary of other variables considered – Each cell is in the format “Variable being considered: no of cases: % of deaths for patients in that cell”

| <b>BACKGROUND AND HISTORY</b>                         |                       |                         |                      |                     |                 |
|-------------------------------------------------------|-----------------------|-------------------------|----------------------|---------------------|-----------------|
| <b>Gender</b>                                         | Males: 716: 15%       | Females: 597: 12%       |                      |                     | NK: 29: 3%      |
| <b>Previous admission</b>                             | First time: 389: 9%   | Readmission: 879: 16%   |                      |                     | NK: 74: 14%     |
| <b>Smoking status</b>                                 | Current: 429: 11%     | EX: 751: 15%            | Never: 74: 8%        |                     | NK: 88: 24%     |
| <b>FEV1 tertiles *</b>                                | Lower: 243: 18%       | Middle: 218: 12%        | Upper: 232: 9%       |                     | NK: 649: 15%    |
| <b>FEV1 % Predicted tertiles</b>                      | <29% pred: 164: 21%   | 29-45% pred: 169: 9%    | >45% pred: 159: 12%  |                     | NK: 850: 14%    |
| <b>Comorbidity **</b>                                 | Yes: 865: 15%         | No: 477: 12%            |                      |                     |                 |
| <b>Comorbidity: Heart Disease</b>                     | Yes: 548: 16%         | No: 794: 12%            |                      |                     |                 |
| <b>On Oral Steroids</b>                               | Yes: 455: 17%         | No/NK: 887: 12%         |                      |                     |                 |
| <b>On Antibiotics</b>                                 | Yes: 263: 12%         | No/NK: 1079: 14%        |                      |                     |                 |
| <b>Known Medications count</b>                        | 0-1:238: 13%          | 2-4: 903: 13%           | 5+: 201: 17%         |                     |                 |
| <b>ASSESSMENT AND MEASUREMENTS ON ADMISSION</b>       |                       |                         |                      |                     |                 |
| <b>Increased breathlessness</b>                       | Yes: 1248: 14%        | No: 44: 18%             |                      |                     | NK: 50: 16%     |
| <b>Increased volume of sputum</b>                     | Yes: 551: 10%         | No: 394: 14%            |                      |                     | NK: 397: 19%    |
| <b>Change in colour of sputum</b>                     | Yes: 482: 10%         | No: 432: 14%            | NK: 428: 18%         |                     |                 |
| <b>Colour of sputum</b>                               | White/grey: 298: 10%  | Yellow: 216: 14%        | Green: 300: 12%      |                     | NK: 528: 17%    |
| <b>Respiratory rate</b>                               | <20: 94: 10%          | 20-29: 561: 11%         | 30+: 289: 18%        |                     | NK: 398: 15%    |
| <b>Temperature</b>                                    | <37: 723: 16%         | 37.0-37.4: 228: 12%     | 37.5+: 209: 8%       |                     | NK: 182: 14%    |
| <b>PaO2</b>                                           | <7.3: 238: 18%        | 7.3-8.0: 118: 10%       | >8.0: 700: 13%       |                     | NK: 286: 14%    |
| <b>PaCO2</b>                                          | ≤6.0: 616: 10%        | >6.0: 440: 19%          |                      |                     | NK: 286: 14%    |
| <b>Comments on Chest X ray</b>                        | Infiltrates: 231: 14% | Other comment: 653: 13% | No comment: 426: 13% |                     |                 |
| <b>INITIAL MANAGEMENT – WITHIN THE FIRST 24 HOURS</b> |                       |                         |                      |                     |                 |
| <b>Formally prescribed oxygen</b>                     | Yes: 848: 15%         | No: 471: 11%            | NK: 23: 30%          |                     |                 |
| <b>Oral steroids</b>                                  | Oral / IV: 651: 14%   | Inhaled: 116: 19%       | Both: 341: 11%       | Yes but NK: 30: 7%  | No/NK: 204: 14% |
| <b>Antibiotics</b>                                    | IV: 208: 22%          | Oral: 619: 10%          | Both: 187: 12%       | Yes but NK: 55: 13% | No/NK: 273: 17% |

\* Lower, middle and upper thirds of FEV1 values in litres were derived separately for males and females:

|         | Lower tertile | Middle tertile | Upper tertile |
|---------|---------------|----------------|---------------|
| Males   | ≤ 0.75        | 0.76 – 1.16    | > 1.16        |
| Females | ≤ 0.60        | 0.61 – 0.89    | > 0.89        |

\*\*Comorbidity: Any record of Heart disease, Stroke, Diabetes, Locomotor problems, Other chest problems, Visual impairment

Table 2a: Length of stay of 8 days or more : summary of other variables considered

| <b>BACKGROUND AND HISTORY</b>                         |                            |                              |                           |                       |                       |
|-------------------------------------------------------|----------------------------|------------------------------|---------------------------|-----------------------|-----------------------|
| <b>Gender</b>                                         | Males: 727: 49%            | Females: 607: 52%            | NK: 28: 43%               |                       |                       |
| <b>Previous admission</b>                             | First time: 399: 47%       | Readmission: 883: 51%        | NK: 80: 54%               |                       |                       |
| <b>Smoking status</b>                                 | Current: 439: 43%          | EX: 757: 53%                 | Never: 74: 55%            | NK: 92: 62%           |                       |
| <b>FEV1 % Predicted tertiles</b>                      | <29% pred: 162: 59%        | 29-45% pred: 169: 49%        | >45% pred: 164: 48%       | NK: 867: 49%          |                       |
| <b>Home circumstances</b>                             | Alone no support: 191: 52% | Spouse or relative: 762: 47% | Alone + support: 274: 59% | Nursing home: 57: 61% | Other & NK: 78: 45%   |
| <b>Comorbidity **</b>                                 | Yes: 876: 53%              | No: 486: 45%                 |                           |                       |                       |
| <b>Comorbidity: Heart Disease</b>                     | Yes: 558: 55%              | No: 804: 47%                 |                           |                       |                       |
| <b>On Oral Steroids</b>                               | Yes: 459: 53%              | No/NK: 903: 49%              |                           |                       |                       |
| <b>On Antibiotics</b>                                 | Yes: 265: 49%              | No/NK: 1097: 51%             |                           |                       |                       |
| <b>Known Medications count</b>                        | 0-1: 243: 48%              | 2-4: 919: 51%                | 5+: 200: 50%              |                       |                       |
| <b>ASSESSMENT AND MEASUREMENTS ON ADMISSION</b>       |                            |                              |                           |                       |                       |
| <b>Increased breathlessness</b>                       | Yes: 1264: 50%             | No: 47: 53%                  | NK: 51: 47%               |                       |                       |
| <b>Increased volume of sputum</b>                     | Yes: 554: 50%              | No: 408: 51%                 | NK: 400: 50%              |                       |                       |
| <b>Change in colour of sputum</b>                     | Yes: 486: 51%              | No: 441: 50%                 | NK: 435: 50%              |                       |                       |
| <b>Colour of sputum</b>                               | White/grey: 301: 41%       | Yellow: 215: 52%             | Green: 304: 52%           | NK: 542: 54%          |                       |
| <b>Bilateral leg oedema</b>                           | Yes: 341: 60%              | No: 557: 47%                 | NK: 464: 47%              |                       |                       |
| <b>Respiratory rate</b>                               | <20: 95: 41%               | 20-29: 567: 49%              | 30+: 294: 52%             | NK: 406: 53%          |                       |
| <b>Temperature</b>                                    | <37: 734: 50%              | 37.0-37.4: 229: 53%          | 37.5+: 213: 47%           | NK: 186: 51%          |                       |
| <b>PaO2</b>                                           | <7.3: 242: 58%             | 7.3-8.0: 119: 40%            | >8.0: 703: 50%            | NK: 298: 49%          |                       |
| <b>PaCO2</b>                                          | ≤6.0: 623: 46%             | >6.0: 441: 57%               | NK: 289: 48%              |                       |                       |
| <b>PH</b>                                             | <7.26: 70: 59%             | 7.26 – 7.34: 147: 55%        | 7.35+: 836: 49%           | NK: 309: 49%          |                       |
| <b>Comments on Chest X ray</b>                        | Infiltrates: 237: 55%      | Other comment: 659: 49%      | No comment: 431: 51%      | NK: 35: 40%           |                       |
| <b>INITIAL MANAGEMENT – WITHIN THE FIRST 24 HOURS</b> |                            |                              |                           |                       |                       |
| <b>Formally prescribed oxygen</b>                     | Yes: 857: 53%              | No: 481: 46%                 | NK: 24: 46%               |                       |                       |
| <b>Repeat of blood gases</b>                          | Yes: 433: 59%              | No: 607: 46%                 | NK: 35: 37%               | NA: 287: 48%          |                       |
| <b>Oral steroids</b>                                  | Oral / IV: 658: 49%        | Inhaled: 119: 66%            | Both: 340: 48%            | Yes but NK: 31: 45%   | No/NK: 214: 50%       |
| <b>Antibiotics</b>                                    | IV: 213: 59%               | Oral: 627: 48%               | Both: 188: 51%            | Yes but NK: 55: 44%   | No/NK: 279: 50%       |
| <b>CONTINUING MANAGEMENT</b>                          |                            |                              |                           |                       |                       |
| <b>PaO2&gt;7.3 at anytime</b>                         | Yes: 445: 52%              | No: 224: 58%                 | NK: 693: 47%              |                       |                       |
| <b>PEF</b>                                            | Un-recordable: 18: 67%     | ≤150: 181: 49%               | >150: 396: 44%            | Done but NK: 95: 71%  | Not Done/NK: 672: 51% |
| <b>Inhaler technique</b>                              | Yes: 234: 58%              | No/NK: 950: 48%              | NA: 178: 53%              |                       |                       |

\*\*Comorbidity: Any record of Heart disease, Stroke, Diabetes, Locomotor problems, Other chest problems, Visual impairment

Table 3a: Readmission within 3 months of study admission: summary of other variables considered

| <b>BACKGROUND AND HISTORY</b>                   |                            |                              |                           |                       |
|-------------------------------------------------|----------------------------|------------------------------|---------------------------|-----------------------|
| <b>Gender</b>                                   | Males: 643: 34%            | Females: 551: 35%            | NK: 27: 22%               |                       |
| <b>Age</b>                                      | <65: 266: 36%              | 65-69: 204: 37%              | 70-74: 288: 37%           | 75-79: 242: 33%       |
| <b>Smoking status</b>                           | Current: 404: 36%          | EX: 674: 34%                 | Never: 67: 33%            | NK: 76: 25%           |
| <b>Home circumstances</b>                       | Alone no support: 176: 30% | Spouse or relative: 692: 35% | Alone + support: 238: 38% | Nursing home: 48: 25% |
| <b>Comorbidity **</b>                           | Yes: 784: 34%              | No: 437: 35%                 |                           |                       |
| <b>Comorbidity: Heart Disease</b>               | Yes: 495: 34%              | No: 726: 34%                 |                           |                       |
| <b>On Oral Steroids</b>                         | Yes: 409: 42%              | No/NK: 812: 30%              |                           |                       |
| <b>On Antibiotics</b>                           | Yes: 236: 39%              | No/NK: 985: 33%              |                           |                       |
| <b>ASSESSMENT AND MEASUREMENTS ON ADMISSION</b> |                            |                              |                           |                       |
| <b>Bilateral leg oedema</b>                     | Yes: 293: 36%              | No: 517: 38%                 | NK: 411: 28%              |                       |
| <b>Temperature</b>                              | <37: 655: 36%              | 37.0-37.4: 208: 39%          | 37.5+: 197: 27%           | NK: 161: 30%          |
| <b>PaO2</b>                                     | <7.3: 213: 28%             | 7.3-8.0: 107: 36%            | >8.0: 638: 38%            | NK: 263: 29%          |
| <b>PaCO2</b>                                    | ≤6.0: 579: 34%             | >6.0: 379: 39%               | NK: 263: 29%              |                       |
| <b>PH</b>                                       | <7.26: 44: 50%             | 7.26 – 7.34: 120: 37%        | 7.35+: 782: 35%           | NK: 265: 30%          |
| <b>Comments on Chest X ray</b>                  | Infiltrates: 210: 34%      | Other comment: 597: 35%      | No comment: 385: 32%      | NK: 29: 41%           |
| <b>CONTINUING MANAGEMENT</b>                    |                            |                              |                           |                       |
| <b>PaO2&gt;7.3 at anytime</b>                   | Yes: 420: 35%              | No: 192: 33%                 | NK: 609: 34%              |                       |
| <b>PEF</b>                                      | Un-recordable: 14: 29%     | ≤150: 175: 38%               | >150: 386: 33%            | Done but NK: 76: 37%  |
| <b>Inhaler technique</b>                        | Yes: 221: 30%              | No/NK: 868: 35%              | NA: 132: 33%              |                       |
| <b>ON DISCHARGE</b>                             |                            |                              |                           |                       |
| <b>Inhaled steroids</b>                         | Yes: 744: 36%              | No/NK: 477: 32%              |                           |                       |
| <b>Oral steroids</b>                            | Yes: 757: 37%              | No/NK: 464: 29%              |                           |                       |
| <b>Antibiotics</b>                              | Yes: 463: 30%              | No/NK: 758: 37%              |                           |                       |
| <b>Home oxygen</b>                              | Yes: 236: 41%              | No/NK: 985: 33%              |                           |                       |
| <b>Outpatient follow-up arranged</b>            | Yes: 764: 34%              | No: 391: 33%                 | NK: 66: 42%               |                       |

\*\*Comorbidity: Any record of Heart disease, Stroke, Diabetes, Locomotor problems, Other chest problems, Visual impairment
